# Supplementary material
Source: PubMed Central journal article supplement (PMC6099884)
Supplement: pnas.1805523115.sapp.pdf [file pnas.1805523115.sapp.pdf]

2

3 **Supplementary Information for**

4

5 **Inhibition of GCN2 sensitizes ASNS-low cancer cells to asparaginase by**  
6 **disrupting the amino acid response**

7

8 Akito Nakamura<sup>a,b,1</sup>, Tadahiro Nambu<sup>b</sup>, Shunsuke Ebara<sup>b</sup>, Yuka Hasegawa<sup>b</sup>, Kosei Toyoshima<sup>b</sup>,  
9 Yasuko Tsuchiya<sup>b</sup>, Daisuke Tomita<sup>b</sup>, Jun Fujimoto<sup>b</sup>, Osamu Kurasawa<sup>b</sup>, Chisato Takahara<sup>c</sup>,  
10 Ayumi Ando<sup>c</sup>, Ryuichi Nishigaki<sup>c</sup>, Yoshinori Satomi<sup>c</sup>, Akito Hata<sup>a,d</sup>, and Takahito Hara<sup>b</sup>

11

12 <sup>a</sup>Oncology Drug Discovery Unit, Takeda Pharmaceuticals International Co., 40 Landsdowne  
13 Street, Cambridge, MA 02139, USA

14 <sup>b</sup>Oncology Drug Discovery Unit, Takeda Pharmaceutical Company Limited, Kanagawa  
15 251-8555, Japan.

16 <sup>c</sup>Integrated Technology Research Laboratories, Takeda Pharmaceutical Company Limited,  
17 Kanagawa 251-8555, Japan.

18 <sup>d</sup>Bio Molecular Research Laboratories, Takeda Pharmaceutical Company Limited, Kanagawa  
19 251-8555, Japan.

20

21 <sup>1</sup> **Corresponding author:** Akito Nakamura

22 Oncology Drug Discovery Unit, Takeda Pharmaceuticals International Inc., 40 Landsdowne  
23 Street, Cambridge, MA 02139, USA

24 E-mail: akito.nakamura@takeda.com

25

26 **This PDF file includes:**

27

28       Supplementary text

29       Figs. S1 to S10

30       Tables S1 to S2

31       References for SI reference citations

32 **Supporting Information Text**

33

34 **Materials and Methods**

35

36 **Compound synthesis**

37 GCN2iA (**2**) was synthesized from compound **1** in a similar manner as that described in the patent (WO  
38 2013110309A1).

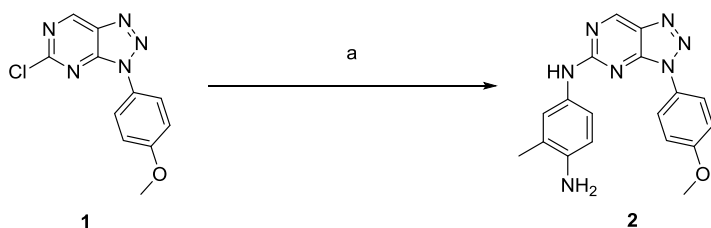

39 Reagents and conditions: (a) DIEA, 2-methylbenzene-1,4-diamine dihydrochloride, 74%.

40 *N*-4-(3-(4-methoxyphenyl)-3*H*-[1,2,3]triazolo[4,5-*d*]pyrimidin-5-yl)-2-methylbenzene-1,4-diamine  
41 (**2**). To a mixture of 5-chloro-3-(4-methoxyphenyl)-3*H*-[1,2,3]triazolo[4,5-*d*]pyrimidine (50 mg, 0.19 mmol)  
42 in dimethyl sulfoxide (DMSO; 1 mL), 2-methylbenzene-1,4-diamine dihydrochloride (74.6 mg, 0.38 mmol)  
43 and diisopropylethylamine (DIEA; 0.167 mL, 0.96 mmol) were added at 25°C. The mixture was stirred at  
44 90°C for 2 h, during which time its color gradually changed to dark brown. The mixture was then poured into  
45 saturated NaHCO<sub>3</sub> (aq) (20 mL), extracted with ethyl acetate (20 mL), washed with brine, and dried over  
46 MgSO<sub>4</sub>. The filtrate was then concentrated *in vacuo*. The residue was purified by silica gel-column  
47 chromatography (*n*-hexane-ethyl acetate = 70:30–0:100) and triturated with *i*Pr<sub>2</sub>O. The precipitate was  
48 collected by filtration to obtain compound **2** (49.2 mg; 74%) as a pale brown solid. <sup>1</sup>H NMR (300 MHz,  
49 DMSO-*d*<sub>6</sub>) δ 2.09 (3H, s), 3.86 (3H, s), 4.76 (2H, brs), 6.59 (1H, d, *J* = 8.5 Hz), 7.16–7.29 (3H, m), 7.54 (1H,  
50 brs), 8.05 (2H, d, *J* = 8.9 Hz), 9.33 (1H, s), and 9.94 (1H, brs).

51

52 GCN2iB (**7**) was synthesized as shown in the following scheme:

53

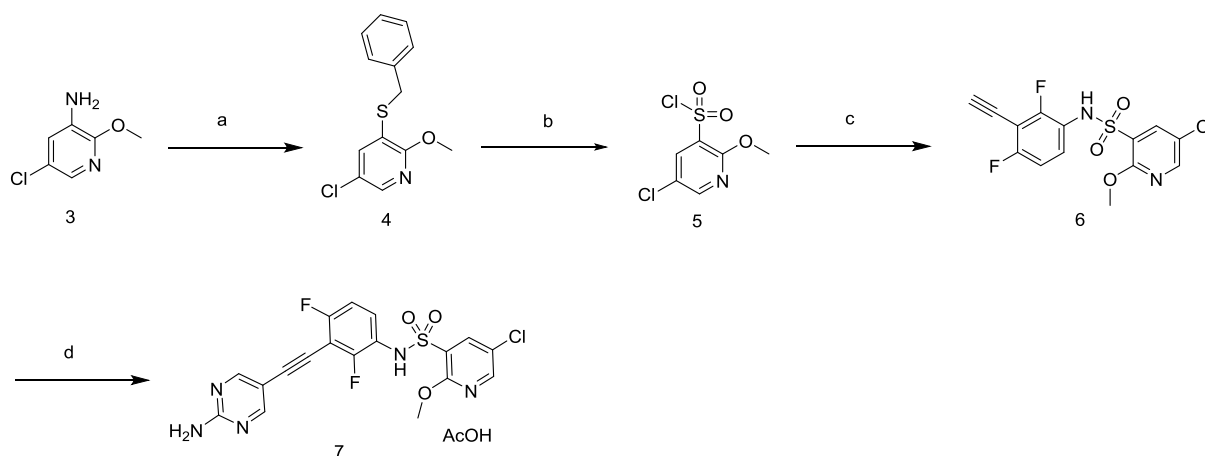

54 Reagents and conditions: (a) dibenzyl disulfide, pentyl nitrite, MeCN; (b) *N*-chlorosuccinimide, AcOH, water, 53% (2 steps); (c) 3-ethynyl-2,4-difluoroaniline, pyridine; (d) 1) 2-amino-5-iodopyrimidine, Pd(PCy<sub>3</sub>)<sub>2</sub>Cl<sub>2</sub>, Cs<sub>2</sub>CO<sub>3</sub>, DMSO, 2) recrystallization from DMSO-water-AcOH, 20% (2 steps).

55

56 3-(Benzylthio)-5-chloro-2-methoxypyridine (**4**). Pentyl nitrite (8.79 ml, 66.0 mmol) was added  
57 dropwise over 20 min to a solution of 1,2-dibenzylsulfane (8.87 g, 36.0 mmol) and  
58 5-chloro-2-methoxypyridin-3-amine (4.76 g, 30 mmol) in acetonitrile (63.1 mL) at 80°C. The mixture was  
59 stirred at 80°C for 30 min and then concentrated *in vacuo*. The residue was purified by silica gel column  
60 chromatography (n-hexane-ethyl acetate = 100 : 0-90 : 10) to obtain crude product **4** (5.40 g) as orange oil.  
61 This material was used in the next reaction without further purification.

62 Next, 5-Chloro-2-methoxypyridine-3-sulfonyl chloride (**5**). N-chlorosuccinimide (16.3 g, 123  
63 mmol) was added dropwise for over 10 min to a solution of **4** (5.40 g, 20.3 mmol) in acetic acid (34.9 mL)  
64 and water (11.0 mL) at 25°C. The mixture was stirred at room temperature overnight. The mixture was  
65 diluted with water, and extracted with EtOAc. The organic layer was washed with brine, dried over MgSO<sub>4</sub>,  
66 and concentrated *in vacuo*. The mixture was concentrated *in vacuo*. The residue was purified by silica gel  
67 column chromatography (n-hexane-ethyl acetate = 100:0-80:20) to yield **5** (4.40 g, 53% for 2 steps) as orange  
68 oil. <sup>1</sup>H NMR (300 MHz, DMSO-d<sub>6</sub>) δ 3.86 (3H, s), 7.91 (1H, d, J = 2.6 Hz), 8.17 (1H, d, J = 2.6 Hz).

69 5-Chloro-N-(3-ethynyl-2,4-difluorophenyl)-2-methoxypyridine-3-sulfonamide (**6**). The mixture of  
70 3-ethynyl-2,4-difluoroaniline (Ref; 1) (2.78 g, 18.18 mmol), **5** (4.40 g, 18.2 mmol) and pyridine (43.1 g, 545  
71 mmol) was stirred at room temperature overnight. Then, MeOH (10 mL) was added to the mixture, and the  
72 mixture was stirred at room temperature for 10 min. The mixture was concentrated *in vacuo*. The residue was  
73 purified by silica gel column chromatography (n-hexane-ethyl acetate = 100:0-50:50) to give crude **6** (5.02 g)  
74 as beige solid. This material was used in the next reaction without further purification.

75 N-(3-((2-aminopyrimidin-5-yl)ethynyl)-2,4-difluorophenyl)-5-chloro-2-methoxypyridine-3-sulfon  
76 amide acetic acid salt (**7**). The mixture of **6** (1.24 g, 3.46 mmol), 5-iodopyrimidin-2-amine (1.15 g, 5.18  
77 mmol), Pd(PCy<sub>3</sub>)<sub>2</sub>Cl<sub>2</sub> (170 mg, 0.24 mmol), cesium carbonate (4.51 g, 13.8 mmol) and DMSO (16.5 ml, 232  
78 mmol) was stirred at 120°C for 3 h under N<sub>2</sub>. The mixture was diluted with water and brine, and extracted  
79 with EtOAc. The organic layer was collected, washed with brine, dried over MgSO<sub>4</sub>, and concentrated *in*  
80 *vacuo*. The residue was purified by silica gel column chromatography (n-hexane-ethyl acetate = 100 : 0-80 :  
81 20) to yield crude product. The crude product was subjected to amino silica gel column chromatography and  
82 eluted with (ethyl acetate-methanol = 100 : 0-50 : 50) to remove byproducts. The amino silica gel, including  
83 the desired product, was subjected to water/EtOAc/AcOH (100 mL-100 mL-18 mL). The mixture was stirred  
84 at room temperature for 10 min, the insoluble materials were filtered off, and further elution with  
85 EtOAc-AcOH (30 mL-6 mL) was carried out 4 times. From the combined filtrate, the organic layer was  
86 collected, washed with water and brine, dried over MgSO<sub>4</sub>, and concentrated *in vacuo*. The residue was  
87 dissolved with EtOAc/THF/saturated NaHCO<sub>3</sub>aq. (120 ml-30 ml-30 ml). The organic layer was collected,  
88 washed with saturated NaHCO<sub>3</sub>aq, brine, dried over MgSO<sub>4</sub>, and concentrated *in vacuo*. This solid was  
89 triturated with EtOAc, and the precipitate was collected by filtration to yield crude product as a white solid  
90 (872 mg). The obtained solid was purified by silica gel column chromatography (n-hexane-ethyl acetate =  
91 100 : 0-0 : 100), and triturated with EtOAc. The precipitate was collected by filtration to yield free form of the  
92 desired product (635 mg). Additional batches with 4.05 times scale and 4.12 times scale were carried out in a

93 similar manner to obtain free form of the desired product (4.83 g). All obtained free form of the desired  
94 product were combined, and dissolved with AcOH (24.8 mL) and DMSO (66 mL) at 50°C. The solution was  
95 filtered to remove small insoluble materials with washing with AcOH (24.8 mL). Water (50 mL) was added  
96 dropwise to the filtrate at 50°C. The mixture was allowed to cool to 25°C for 30 min. The precipitate was  
97 collected by filtration, washed with EtOH-water (1/10, 33 mL) 3 times and dried under vacuum at 50°C to  
98 yield 7 (5.53 g, 20% for 2 steps) as a white solid. <sup>1</sup>H NMR (300 MHz, DMSO-d<sub>6</sub>) δ 1.91 (3H, s), 3.94 (3H, s),  
99 7.14-7.37 (4H, m), 8.07 (1H, d, J = 2.6 Hz), 8.43 (2H, s), 8.52 (1H, d, J = 2.6 Hz), 10.46 (1H, s), 11.94 (1H, s).  
100 Anal. Calcd for C<sub>20</sub>H<sub>16</sub>ClF<sub>2</sub>N<sub>5</sub>O<sub>5</sub>S: C, 46.93; H, 3.15; N, 13.68. Found: C, 46.85; H, 3.17; N, 13.64.

101

## 102 **GCN2 kinase assay**

103 Recombinant GCN2 (1 nmol/L) protein (Carna Biosciences) was pre-incubated with GCN2 inhibitors for 60  
104 min and then incubated with ATP ( $K_M$  value of GCN2 = 190 μmol/L) and the green fluorescent protein-eIF2α  
105 substrate (130 nmol/L) at 25°C. The amount of phosphorylated substrate was determined using the  
106 LanthaScreen Tb-anti-p-eIF2α (pSer52) antibody kit (Thermo Fisher Scientific). The IC<sub>50</sub> value of eIF2α  
107 kinase was measured using the XLfit software (IDBS).

108

## 109 **Kinase panel**

110 Kinase selectivity of GCN2iA was evaluated at 1 μmol/L using a panel of 27 kinases that covers major kinase  
111 families. Serine/threonine kinase assays were performed using [ $\gamma$ -<sup>33</sup>P] ATP in 96-well plates. The reaction  
112 conditions were optimized for each kinase: p38α (100 ng/well enzyme, 1 μg/well myelin basic protein  
113 [MBP], 0.1 μCi/well [ $\gamma$ -<sup>33</sup>P] ATP, 60-min reaction at 30°C); extracellular signal-regulated protein kinase 1  
114 (ERK1; 100 ng/well enzyme, 2 μg/well MBP, 0.1 μCi/well [ $\gamma$ -<sup>33</sup>P] ATP, 60-min reaction at 30°C); protein  
115 kinase C ζ (PKCζ; 25 ng/well enzyme, 2 μg/well MBP, 0.1 μCi/well [ $\gamma$ -<sup>33</sup>P] ATP, lipid activator [Millipore],  
116 60-min reaction at 30°C); c-Jun N-terminal kinase 1 (JNK; 10 ng/well enzyme, 1 μg/well c-Jun, 0.1 μCi/well  
117 [ $\gamma$ -<sup>33</sup>P] ATP, 60-min reaction at 30°C); mitogen-activated protein kinase 1 (MEK1; 100 ng/well enzyme, 0.3  
118 μg/well glutathione S-transferase-ERK1 [K71A], 0.2 μCi/well [ $\gamma$ -<sup>33</sup>P] ATP, 20-min reaction at 25 °C);  
119 Aurora-B (50 ng/well enzyme, 30 μmol/L Aurora-substrate peptide, 0.2 μCi/well [ $\gamma$ -<sup>33</sup>P] ATP, 60-min  
120 reaction at 25°C); protein kinase A (PKA; 3 nmol/L enzyme, 1 μmol/L PKA-substrate peptide [Millipore],  
121 0.2 μCi/well [ $\gamma$ -<sup>33</sup>P] ATP, 10-min reaction at 25°C); cyclin-dependent kinase 2 in complex with cyclin A  
122 (CDK2/CycA; 1.8 mU/well enzyme, 1 μg/well histone H1, 0.2 μCi/well [ $\gamma$ -<sup>33</sup>P]ATP, 20-min reaction at  
123 25°C); casein kinase 1 δ (CK1δ; 120 ng/well enzyme, 2.4 μmol/L CK1tide [Millipore], 0.2 μCi/well [ $\gamma$ -<sup>33</sup>P]  
124 ATP, 20-min reaction at 25°C); checkpoint kinase 1 (CHK1; 30 ng/well enzyme, 25 μM CHKtide [Millipore],  
125 0.2 μCi/well [ $\gamma$ -<sup>33</sup>P] ATP, 10-min reaction at 25°C); GSK-3β (25 ng/well enzyme, 0.2 μg/well  
126 GSK3-substrate peptide [Millipore], 0.1 μCi/well [ $\gamma$ -<sup>33</sup>P] ATP, 30-min reaction at 25°C); Akt1 (120 ng/well  
127 enzyme, 5 μmol/L Akt1-substrate [Millipore], 0.2 μCi/well [ $\gamma$ -<sup>33</sup>P] ATP, 20-min reaction at 25°C); apoptosis  
128 signal-regulating kinase 1 (ASK1; 25 ng/well enzyme, 2 μg/well MBP, 0.1 μCi/well [ $\gamma$ -<sup>33</sup>P] ATP, 60-min  
129 reaction at 25°C); mitogen-activated protein kinase-activated protein kinase 2 (MAPKAP2; 300 ng/well  
130 enzyme, 0.5 μmol/L KKLNRTLSVA-NH<sub>2</sub>, 0.1 μCi/well [ $\gamma$ -<sup>33</sup>P] ATP, 10-min reaction at 25°C);

131 rho-associated, coiled-coil-containing protein kinase 1 (ROCK1; 164 ng/well enzyme, 0.5  $\mu$ mol/L long S6  
132 peptide [Millipore], 0.2  $\mu$ Ci/well [ $\gamma$ -33P] ATP, 10-min reaction at 25°C); polo-like kinase 1 (PLK1; 25  
133 ng/well enzyme, 3  $\mu$ g/well of casein [Sigma-Aldrich], 0.2  $\mu$ Ci/well [ $\gamma$ -33P] ATP, 60-min reaction at 25°C);  
134 interleukin-1 receptor-associated kinase 4 (IRAK4; 27.7 ng/well enzyme, 0.5  $\mu$ mol/L MBP, 0.2  $\mu$ Ci/well of  
135 [ $\gamma$ -33P] ATP, 60-min reaction at 25°C); and cell division cycle 7/activator of S-phase kinase (CDC7/Dbf4  
136 complex; 3.1 ng/well enzyme, 500 ng/well His-tagged minichromosome maintenance complex component 2,  
137 0.2  $\mu$ Ci/well [ $\gamma$ -33P] ATP, 60-min reaction at 25°C). Enzyme reactions were performed in 25 mmol/L HEPES  
138 (pH 7.5) supplemented with 10 mmol/L magnesium acetate, 1 mmol/L dithiothreitol, and 500 nmol/l ATP,  
139 and containing an optimized concentration of enzyme, substrate, and radiolabeled ATP, as described above,  
140 in a total volume of 50  $\mu$ L. Prior to initiating the kinase reaction, the compound and enzyme were incubated  
141 for 5 min at the reaction temperature described; the reaction was then initiated by adding ATP. After the  
142 reaction periods mentioned, the reactions were terminated by adding 10% trichloroacetic acid. The  
143 [ $\gamma$ -33P]-phosphorylated proteins were filtered into 96-well filter plates using a cell harvester (PerkinElmer),  
144 and free [ $\gamma$ -33P] ATP was removed by washing with 3% phosphoric acid. The plates were dried, and 40  $\mu$ L  
145 MicroScint0 (PerkinElmer) was added. Radioactivity was measured using a TopCount scintillation counter  
146 (PerkinElmer).

147 Assays for tyrosine kinases were performed using the Alphascreen system (PerkinElmer) in  
148 384-well plates at 25°C. The reaction conditions for these kinase assays were optimized for each kinase:  
149 VEGF receptor 2 (VEGFR2; 19 ng/mL enzyme, 10  $\mu$ M ATP, 10-min reaction, PY-100-conjugated acceptor  
150 beads [PY-100]); proto-oncogene tyrosine-protein kinase (SRC; 0.33 ng/mL enzyme, 2  $\mu$ mol/L ATP, 10-min  
151 reaction, PY-100); IRK (100 ng/mL enzyme, 10  $\mu$ mol/L ATP, 60-min reaction, PT66); focal adhesion kinase  
152 (FAK; 30 ng/mL enzyme, 2  $\mu$ mol/L ATP, 20-min reaction, PT66); ephrin receptor A5 (EphA5; 1 ng/mL  
153 enzyme, 2  $\mu$ mol/L ATP, 10-min reaction, PY-100); Janus kinase 1 (JAK1; 100 ng/mL enzyme, 0.2  $\mu$ mol/L  
154 ATP, 10-min reaction, PT66); and endothelial growth factor receptor (EGFR; 100 ng/mL enzyme, 1.0  $\mu$ mol/L  
155 ATP, 10-min reaction, PT66). The enzyme reactions were performed in 50 mmol/L Tris-HCl (pH 7.5) with 5  
156 mmol/L MnCl<sub>2</sub>, 5 mmol/L MgCl<sub>2</sub>, 0.01% Tween-20, 2 mmol/L dithiothreitol, 0.1  $\mu$ g/mL biotinylated  
157 poly-GluTyr (4 : 1), and optimized concentrations of enzyme and ATP, as described. Prior to the initiation of  
158 the kinase reaction, the compound and enzyme were incubated for 5 min at 25°C. The reaction was then  
159 initiated by adding ATP. The reactions were stopped by the addition of 25  $\mu$ L of 100 mmol/L EDTA, 10  
160  $\mu$ g/mL Alphascreen streptavidin donor beads (PerkinElmer), and 10  $\mu$ g/mL acceptor beads in 62.5 mmol/L  
161 HEPES (pH 7.4), 250 mmol/L NaCl, and 0.1% bovine serum albumin. The plates were incubated in the dark  
162 for > 12 h, followed by analysis using an EnVision plate reader (PerkinElmer).

163 Assays for phosphatidylinositol-4,5-bisphosphate 3-kinase  $\alpha$  (PI3K $\alpha$ ) were performed using a phospholipid  
164 FlashPlate coated with 5  $\mu$ mol/L L- $\alpha$ -phosphatidyl-D-myo-inositol 4,5-diphosphate. The reaction conditions  
165 were optimized for PI3K $\alpha$  (80 ng/well enzyme, 0.15  $\mu$ Ci/well of [ $\gamma$ -33P] ATP, 60-min reaction at 25°C), and  
166 radioactivity was measured using a TopCount scintillation counter (PerkinElmer).

167 For kinome-wide profiling, kinase selectivity of GCN2iB was evaluated at 1  $\mu$ mol/L using a panel  
168 of 468 kinases at DiscoverX (KINOMEScan). The platform employs an active site-directed competition

169 binding assay to quantitatively measure interactions between test compounds and kinases.

170

### 171 **Short interfering RNA**

172 ASNS or ATF4 siRNAs were purchased from GE Dharmacon (OnTARGETplus) or Thermo Fisher Scientific  
173 (Silencer Select), respectively. Human Cell Death siRNA was purchased from Qiagen and used as a positive  
174 control for transfection efficiency. The sequences of the sense siRNAs are shown below:

175 ASNS-1: 5'-GGG UAG AGA UAC AUA UGG A-3'; ASNS-2: 5'-UAU GUU GGA UGG UGU GUU U-3';

176 ASNS-3: 5'-GGU GAA AUC UAC AAC CAU A-3'; ATF4-1: 5'-GCC UAG GUC UCU UAG AUG A-3';

177 ATF4-2: 5'-CCC UGU UGG GUA UAG AUG A-3'; and ATF4-3: 5'-GUG AGA AAC UGG AUA AGA A-3'.

178

### 179 **Transfection and western blot analysis**

180 Adherent or floating cells were transfected with siRNAs using Lipofectamine RNAi MAX (Invitrogen) or  
181 GenomeONE with inactivated Sendai virus envelope (Ishihara Sangyo), respectively. Western blot analysis  
182 was performed as described in a previous study (Ref; 2).

183 The following antibodies were used for the western blot analysis: anti-phospho-Ser473-Akt (#4060,  
184 1:1000), -ATF4 (#11815, 1:1000), -cleaved PARP (#5625, 1:1000), -eIF2 $\alpha$  (#5324, 1:2000),  
185 -phospho-Ser51-eIF2 $\alpha$  (#3597, 1:1000), -phospho-Thr202/Tyr204-ERK (#4370, 1:1000), -GCN2 (#3302,  
186 1:1000), -phospho-Thr183/Tyr185-JNK (#9251, 1:1000), -phospho-Thr180/Tyr182-p38 (#9211, 1:1000),  
187 -PERK (#3192, 1:1000), -Sestrin2 (#8487, 1:1000), -S6K (#9202, 1:1000), and -phospho-Thr389-S6K  
188 (#9234, 1:1000) (Cell Signaling Technology); anti-ASNS (#14681-1-AP, 1:2000) and -GADD34  
189 (#10449-1-AP, 1:1000) (Proteintech); anti-HSP90 (#610419, 1:2000, BD Transduction Laboratories);  
190 anti-phospho-Thr899-GCN2 (#ab75836, 1:1000, Abcam); and anti-puromycin (#MABE343, 1:1000,  
191 Millipore). eIF2 $\alpha$  and HSP90 were used as loading controls.

192

### 193 **Amino acid measurement**

194 Cells, culture medium, tissue, and plasma ( $N = 3$ ) were homogenized in ice-cold methanol using a  
195 ShakeMaster Auto (BioMedical Science) and centrifuged at  $15,000 \times g$  for 5 min. The supernatant was dried  
196 by nitrogen stream and derivatized using N-methyl-N-(tert-butyldimethylsilyl) trifluoroacetamide. The  
197 reaction mixture was injected into an Agilent 7890A series GC system in the split injection mode (10/1 [v/v])  
198 using a GC injector 80 autosampler (Agilent Technologies). GC separation was performed using an Agilent  
199 J&W GC column HP-5 ms (30 m  $\times$  0.25 mm i.d.,  $df = 0.25 \mu\text{m}$ ) and a temperature gradient (100°C for 4 min,  
200 from 100°C to 285°C at 4 °C/min, from 285°C to 325°C at 4 °C/min, and 325°C for 2 min) with a constant  
201 flow of helium gas at 1 mL/min. The eluate was ionized by electron-impact ionization (70 eV) at an  
202 ion-source temperature of 230°C and introduced into an Agilent 7010B triple-quadrupole mass spectrometer  
203 (Agilent Technologies). Each target molecule was detected by selected ion monitoring, the parameters for  
204 which were optimized using standard reagents.

205 For quantitation of amino acids, a standard solution was prepared by mixing all amino acids at  
206 concentrations of 0.2, 1, 2, 10, 20, 100, and 200 nmol/L. Internal standard solution 1 (IS1) was prepared by

207 diluting with (U-13C3, U-15N)-cell-free amino acid mix (20 AA; Cambridge Isotope Laboratories) until the  
208 total amino acid concentration reached 2 mg/mL. Internal standard solution 2 (IS2) was diluted with  
209 (U-13C3, U-15N)-cysteine (5  $\mu\text{mol/L}$ ). Each standard solution (25  $\mu\text{L}$ ) was mixed with 50  $\mu\text{L}$  of methanol,  
210 which was used as the blank control, and 10  $\mu\text{L}$  of IS1 or IS2. The mixture was dried, derivatized, and  
211 analyzed using GC-MS. Quantitative reliability was confirmed by the linearity of the calibration curve ( $R^2 >$   
212 0.99) and the accuracy ( $< 20\%$ ) and precision ( $< 20\%$ ;  $N = 6$ ) of the spike-and-recovery test.

213

#### 214 **Gene expression data for cancer cell lines**

215 Data were collected from public databases associated with the Cancer Cell Line Encyclopedia and  
216 GlaxoSmithKline. All data were obtained as CEL files and signal values were extracted using the MAS5.0  
217 algorithm.

218

#### 219 **Microarray analysis**

220 Total RNA was extracted using the RNeasy Miniprep kit (Qiagen), according to the manufacturer's protocol.  
221 Preparation of cRNA, hybridization, and microarray scanning were performed using MacroGen, according to  
222 the manufacturer's protocol (Agilent Technologies). Labeled cRNA was hybridized to Agilent SurePrint G3  
223 human GE 8X60K microarrays (Agilent Technologies), which were immediately scanned using an Agilent  
224 microarray scanner D (Agilent Technologies). The results of the microarray were obtained using Agilent  
225 Feature Extraction software (v.11.0; Agilent Technologies). Pathway and upstream analyses were performed  
226 using Ingenuity Pathway Analysis (Qiagen).

227

#### 228 **Cell viability assay**

229 Cell viability was assessed using the CellTiter-Glo luminescent cell viability assay (Promega), according to  
230 the manufacturer's protocol. Sigmoidal dose-response (variable slope) curves were fitted using a nonlinear  
231 regression analysis. The  $\text{IC}_{50}$  or  $\text{IC}_{70}$  values of the chemical compounds or enzymes were calculated using  
232 GraphPad Prism software v.6.

233

#### 234 **Caspase 3/7 assay**

235 Caspase 3/7 activity was assessed using the Caspase-Glo 3/7 assay (Promega), according to the  
236 manufacturer's protocol.

237

#### 238 **Animal study**

239 A suspension of CCRF-CEM, HPB-ALL, MV-4-11, or SU.86.86 cells ( $1 \times 10^7$  cells/site) was subcutaneously  
240 injected into the right flanks of 6-week-old female SCID mice (C.B17/Icr-scid/scid Jcl; CLEA). Tumor  
241 volume was calculated as  $\text{volume} = L \times l^2 \times 1/2$ , where L represents the longest diameter across the tumor and  
242 l represents the corresponding perpendicular distance. Body weight was also measured. To assess the  
243 anti-tumor activity, mice with tumor mass  $\sim 200 \text{ mm}^3$  were sorted into treatment groups ( $N = 5/\text{group}$ ) (to  
244 ensure similarity in mean tumor volume among the groups). The tumors were monitored and mice were

245 euthanized when an endpoint (defined as tumor volume > 2,000 mm<sup>3</sup>, severe ataxia, and body weight loss >  
246 20% compared with the body weight on the day of randomization) was reached, or at the end of the study,  
247 whichever came first. From the next day of randomization, GCN2 inhibitors or ASNase dissolved in distilled  
248 water containing 0.5% methylcellulose or 5% glucose was orally or intraperitoneally administered to mice  
249 bearing the xenografts for 7 to 10 days, respectively. T/C (%), an index of anti-tumor activity, was calculated  
250 by comparing the mean change in tumor volume during the treatment period in the control and treated  
251 groups. For western blot analysis, tumors were homogenized with Lysing Matrix I (MP Biomedicals) in a  
252 lysis buffer (10% glycerol, 1% sodium dodecyl sulfate, and 62.5 mmol/L Tris-HCl [pH 7.5] with protease and  
253 phosphatase inhibitors, cOMplete Mini and PhosSTOP, respectively; Sigma-Aldrich).

254 For the disseminated leukemia model, suspension of MOLT-3 cells ( $1 \times 10^7$  cells/head) was  
255 inoculated in to SCID mice via the tail vein. Fourteen days after inoculation, mice were assigned into  
256 treatment groups ( $N = 7$ /group) randomly based on body weight. From the next day of randomization, the  
257 compounds were administered to mice for 28 days. The survival rate was determined by the Kaplan-Meier  
258 analysis.

259 The mice were housed and maintained in accordance with the institutional guidelines established by  
260 the Institutional Animal Care and Use Committee, in a facility accredited by the American Association for  
261 Accreditation of Laboratory Animal Care. All animal experimental protocols were approved by the  
262 Institutional Animal Care and Use Committee.

263

#### 264 **Statistical analysis**

265 To assess the *in vitro* anti-proliferative effects of the GCN2 inhibitors in the presence or absence of ASNase  
266 for the cell-panel study, a paired *t*-test comparison was performed using the GraphPad Prism software (v.6;  
267 GraphPad Software). To assess the correlation between variables, linear regression analysis was performed,  
268 and the correlation coefficient was determined by Pearson's correlation using the GraphPad Prism software.  
269 To assess the *in vivo* antitumor effect of the treatment methods, Dunnett's multiple-comparison test was  
270 performed, followed by one-way ANOVA with T/C (%) values. A two-way ANOVA was performed to  
271 examine the primary effects of treatment with the GCN2 inhibitor or the ASNase, as well as the  
272 combinatorial effect of treatments with T/C values. The combinatorial effect was assessed using the  
273 following criteria: 1) synergistic effect, defined as the significant differences observed in the combined effect  
274 of treatment with a GCN2 inhibitor and ASNase, along with the enhancements in effect caused by each  
275 treatment; 2) additive effect, defined as significant differences observed in the primary effect of treatment  
276 with a GCN2 inhibitor or ASNase, but not in their combined form; and 3) antagonistic effect, defined as the  
277 significant differences observed in the combined effect of treatment with a GCN2 inhibitor and ASNase,  
278 along with the reductions in effect caused by each treatment. To assess the effect of treatment on survival  
279 curve in the disseminated model, log-rank test was performed between vehicle-treated group and treatment  
280 groups. Cox regression analysis was performed to examine the main effect of a GCN2 inhibitor and ASNase,  
281 and effect of interaction between the 2 treatments with survival curves using SAS version 9.1.3 (SAS  
282 Institute Inc.). Other statistical analyses for *in vivo* studies were conducted using EXXSUS (Release 8.0; CAC



283 Croit Corporation). The different groups were compared using Bonferroni's multiple-comparison test, unless  
 284 otherwise mentioned. Differences were considered significant when  $P < 0.05$ .

285

286 **Cell lines and culture**

287 Cell lines were cultured at 37°C with 5% CO<sub>2</sub> in the recommended medium supplemented with 10%–20%  
 288 FBS. The cell lines for which the asparagine-free medium (e.g., Dulbecco's modified Eagle's medium) was  
 289 recommended were maintained in RPMI1640 medium. We established two ASNase-resistant cell lines  
 290 (MOLT-4-R1 and-R2; two replicates) by treating them with increasing concentrations of ASNase (0.00001–1  
 291 U/mL) for 4 months. All cell lines were stocked after *Mycoplasma* testing (at the Central Institute for  
 292 Experimental Animals) and used within 2 months of resuscitation. The authors did not perform any  
 293 authentication. Detailed information on the cell lines is provided as follows.

294

| Cell line  | Cell type                  | Source | Year |
|------------|----------------------------|--------|------|
| CMK-11-5   | Acute myelogenous leukemia | JCRB   | 2014 |
| EOL-1      | Acute myelogenous leukemia | DSMZ   | 2014 |
| GF-D8      | Acute myelogenous leukemia | DSMZ   | 2014 |
| HEL.92.1.7 | Acute myelogenous leukemia | ATCC   | 2014 |
| HL-60      | Acute myelogenous leukemia | ATCC   | 2014 |
| HNT-34     | Acute myelogenous leukemia | RIKEN  | 2015 |
| Kasumi-1   | Acute myelogenous leukemia | JCRB   | 2014 |
| KG-1       | Acute myelogenous leukemia | ATCC   | 2014 |
| KG-1a      | Acute myelogenous leukemia | RIKEN  | 2015 |
| KO52       | Acute myelogenous leukemia | JCRB   | 2014 |
| M-07e      | Acute myelogenous leukemia | DSMZ   | 2014 |
| MKPL-1     | Acute myelogenous leukemia | JCRB   | 2014 |
| ML-1       | Acute myelogenous leukemia | ECACC  | 2015 |
| ML-2       | Acute myelogenous leukemia | DSMZ   | 2014 |
| MOLM-16    | Acute myelogenous leukemia | DSMZ   | 2014 |
| MV-4-11    | Acute myelogenous leukemia | ATCC   | 2016 |
| NKM-1      | Acute myelogenous leukemia | JCRB   | 2014 |
| NOMO-1     | Acute myelogenous leukemia | JCRB   | 2014 |
| OCI-AML3   | Acute myelogenous leukemia | DSMZ   | 2014 |
| OCI-M2     | Acute myelogenous leukemia | DSMZ   | 2014 |
| PL-21      | Acute myelogenous leukemia | JCRB   | 2014 |
| SKM-1      | Acute myelogenous leukemia | JCRB   | 2014 |
| SKNO-1     | Acute myelogenous leukemia | JCRB   | 2015 |
| TF-1       | Acute myelogenous leukemia | ATCC   | 2014 |

|            |                              |       |      |
|------------|------------------------------|-------|------|
| TF-1a      | Acute myelogenous leukemia   | ATCC  | 2014 |
| THP-1      | Acute myelogenous leukemia   | ATCC  | 2014 |
| BALL-1     | Acute lymphoblastic leukemia | JCRB  | 2015 |
| CCRF-CEM   | Acute lymphoblastic leukemia | ATCC  | 2014 |
| CCRF-HSB-2 | Acute lymphoblastic leukemia | JCRB  | 2015 |
| CCRF-SB    | Acute lymphoblastic leukemia | JCRB  | 2015 |
| DND-41     | Acute lymphoblastic leukemia | DSMZ  | 2014 |
| HAL-01     | Acute lymphoblastic leukemia | RIKEN | 2014 |
| HPB-ALL    | Acute lymphoblastic leukemia | DSMZ  | 2014 |
| Jurkat     | Acute lymphoblastic leukemia | RIKEN | 2014 |
| Loucy      | Acute lymphoblastic leukemia | ATCC  | 2015 |
| MOLT-3     | Acute lymphoblastic leukemia | ATCC  | 2014 |
| MOLT-4     | Acute lymphoblastic leukemia | ATCC  | 2014 |
| NALM-6     | Acute lymphoblastic leukemia | RIKEN | 2014 |
| PALL-2     | Acute lymphoblastic leukemia | JCRB  | 2015 |
| Peer       | Acute lymphoblastic leukemia | JCRB  | 2015 |
| Reh        | Acute lymphoblastic leukemia | ATCC  | 2014 |
| RS4;11     | Acute lymphoblastic leukemia | ATCC  | 2015 |
| SUP-B15    | Acute lymphoblastic leukemia | ATCC  | 2015 |
| TALL-1     | Acute lymphoblastic leukemia | DSMZ  | 2014 |
| Tanoue     | Acute lymphoblastic leukemia | RIKEN | 2015 |
| TMD5       | Acute lymphoblastic leukemia | JCRB  | 2015 |
| AsPC-1     | Pancreatic cancer            | ATCC  | 2011 |
| BxPC-3     | Pancreatic cancer            | ATCC  | 2013 |
| Capan-1    | Pancreatic cancer            | ATCC  | 2011 |
| Capan-2    | Pancreatic cancer            | ATCC  | 2011 |
| CFPAC-1    | Pancreatic cancer            | ATCC  | 2011 |
| DAN-G      | Pancreatic cancer            | DSMZ  | 2011 |
| HPAC       | Pancreatic cancer            | ATCC  | 2011 |
| HPAF-II    | Pancreatic cancer            | ATCC  | 2014 |
| HuP-T3     | Pancreatic cancer            | ECACC | 2011 |
| HuP-T4     | Pancreatic cancer            | ECACC | 2016 |
| KP-4       | Pancreatic cancer            | JCRB  | 2011 |
| Panc 02.03 | Pancreatic cancer            | ATCC  | 2011 |
| Panc 04.03 | Pancreatic cancer            | ATCC  | 2011 |
| Panc 05.04 | Pancreatic cancer            | ATCC  | 2011 |
| PK-45H     | Pancreatic cancer            | RIKEN | 2011 |

|           |                               |       |      |
|-----------|-------------------------------|-------|------|
| PK-59     | Pancreatic cancer             | RIKEN | 2011 |
| PL45      | Pancreatic cancer             | ATCC  | 2011 |
| SU.86.86  | Pancreatic cancer             | ATCC  | 2011 |
| SUIT2     | Pancreatic cancer             | JCRB  | 2011 |
| TCC-PAN2  | Pancreatic cancer             | JCRB  | 2011 |
| COLO-205  | Colorectal cancer             | ATCC  | 2014 |
| HCT-116   | Colorectal cancer             | ATCC  | 2013 |
| HCT-15    | Colorectal cancer             | ATCC  | 2012 |
| HT-29     | Colorectal cancer             | ATCC  | 2013 |
| SW1417    | Colorectal cancer             | ATCC  | 2014 |
| SW48      | Colorectal cancer             | ATCC  | 2013 |
| SW620     | Colorectal cancer             | ATCC  | 2014 |
| SW948     | Colorectal cancer             | ATCC  | 2014 |
| T84       | Colorectal cancer             | ATCC  | 2013 |
| OCI-LY3   | Diffuse large B-cell lymphoma | DSMZ  | 2015 |
| Pfeiffer  | Diffuse large B-cell lymphoma | ATCC  | 2012 |
| SU-DHL-10 | Diffuse large B-cell lymphoma | DSMZ  | 2012 |
| SU-DHL-2  | Diffuse large B-cell lymphoma | ATCC  | 2015 |
| SU-DHL-4  | Diffuse large B-cell lymphoma | DSMZ  | 2013 |
| Toledo    | Diffuse large B-cell lymphoma | ATCC  | 2012 |
| WSU-DLCL2 | Diffuse large B-cell lymphoma | DSMZ  | 2013 |
| A549      | Non-small cell lung cancer    | ATCC  | 2013 |
| NCI-H2228 | Non-small cell lung cancer    | ATCC  | 2013 |
| NCI-H23   | Non-small cell lung cancer    | ATCC  | 2012 |
| NCI-H460  | Non-small cell lung cancer    | ATCC  | 2013 |
| NCI-H522  | Non-small cell lung cancer    | ATCC  | 2012 |
| NCI-H661  | Non-small cell lung cancer    | ATCC  | 2014 |
| SW1271    | Non-small cell lung cancer    | ATCC  | 2014 |
| A2780     | Ovarian cancer                | ECACC | 2014 |
| Caov-3    | Ovarian cancer                | ATCC  | 2013 |
| Caov-4    | Ovarian cancer                | ATCC  | 2015 |
| OVCAR-3   | Ovarian cancer                | ATCC  | 2013 |
| PA-1      | Ovarian cancer                | ATCC  | 2014 |
| SKOV-3    | Ovarian cancer                | ATCC  | 2013 |
| HepG2     | Hepatocellular carcinoma      | ATCC  | 2013 |
| HLE       | Hepatocellular carcinoma      | JCRB  | 2016 |
| Huh-7     | Hepatocellular carcinoma      | JCRB  | 2015 |

|            |                          |       |      |
|------------|--------------------------|-------|------|
| JHH-4      | Hepatocellular carcinoma | JCRB  | 2016 |
| Li-7       | Hepatocellular carcinoma | RIKEN | 2014 |
| SK-HEP-1   | Hepatocellular carcinoma | ATCC  | 2014 |
| CAMA-1     | Breast cancer            | ATCC  | 2013 |
| MCF7       | Breast cancer            | ATCC  | 2014 |
| MDA-MB-361 | Breast cancer            | ATCC  | 2013 |
| MDA-MB-468 | Breast cancer            | ATCC  | 2014 |
| T47D       | Breast cancer            | ATCC  | 2014 |
| SK-MEL-2   | Melanoma                 | ATCC  | 2014 |
| SK-MEL-24  | Melanoma                 | ATCC  | 2013 |
| SK-MEL-28  | Melanoma                 | ATCC  | 2014 |
| SK-MEL-5   | Melanoma                 | ATCC  | 2014 |
| NCI-H929   | Multiple myeloma         | ATCC  | 2012 |
| RPMI-8226  | Multiple myeloma         | JCRB  | 2014 |
| U266B1     | Multiple myeloma         | ATCC  | 2012 |
| U-2-OS     | Osteosarcoma             | ATCC  | 2014 |

| Abbreviations | Full name                                              |
|---------------|--------------------------------------------------------|
| ATCC          | American Type Culture Collection                       |
| DSMZ          | Deutsche Sammlung von Mikroorganismen und Zellkulturen |
| ECACC         | The European Collection of Authenticated Cell Cultures |
| JCRB          | Japanese Collection of Research Bioresources           |
| RIKEN         | RIKEN                                                  |

296 **Supplementary Figures**

297

298

299

300

301

302

303

**A**

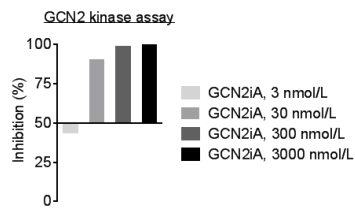

| Kinase | IC <sub>50</sub> (nmol/L) | Inh. (%) | GCN2iA (nmol/L) |
|--------|---------------------------|----------|-----------------|
| GCN2   | 4.0                       | 44       | 3               |
|        |                           | 90       | 30              |
|        |                           | 98       | 300             |
|        |                           | 100      | 3,000           |

**B**

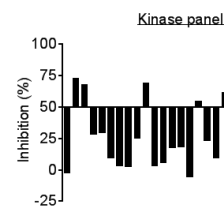

| Family | Kinase | Inh. @ 1 μmol/L (%) | Family       | Kinase   | Inh. @ 1 μmol/L (%) |
|--------|--------|---------------------|--------------|----------|---------------------|
| TK     | EGFR   | -2                  | AGC          | PKA      | 19                  |
|        | VEGFR2 | 72                  |              | AKT1     | -5                  |
|        | cMET   | 67                  |              | Aurora B | 54                  |
|        | SRC    | 29                  |              | ROCK1    | 24                  |
|        | FAK    | 30                  |              | PKCζ     | 10                  |
|        | IRK    | 10                  | CAMK         | CHK1     | 61                  |
|        | EphA5  | 4                   |              | MAPKAP2  | 0                   |
|        | JAK1   | 5                   | CMGC         | ERK1     | 3                   |
| TKL    | IRAK4  | 26                  |              | CDK2     | 61                  |
|        | TrkA   | 68                  | STE          | p38α     | 0                   |
| STE    | MEK1   | -2                  |              | GSK3β    | 95                  |
|        | ASK1   | -9                  | Others       | CDC7     | 10                  |
| CK1    | CK1δ   | 2                   |              | PLK1     | 63                  |
|        |        |                     | Lipid kinase | PI3Kα    | 18                  |

304

305

306

307

308 **Fig. S1.** Potency and kinase selectivity of GCN2iA. (A) GCN2 kinase assay using GCN2iA. (B) Kinase  
309 selectivity of GCN2iA in a focused kinase panel.

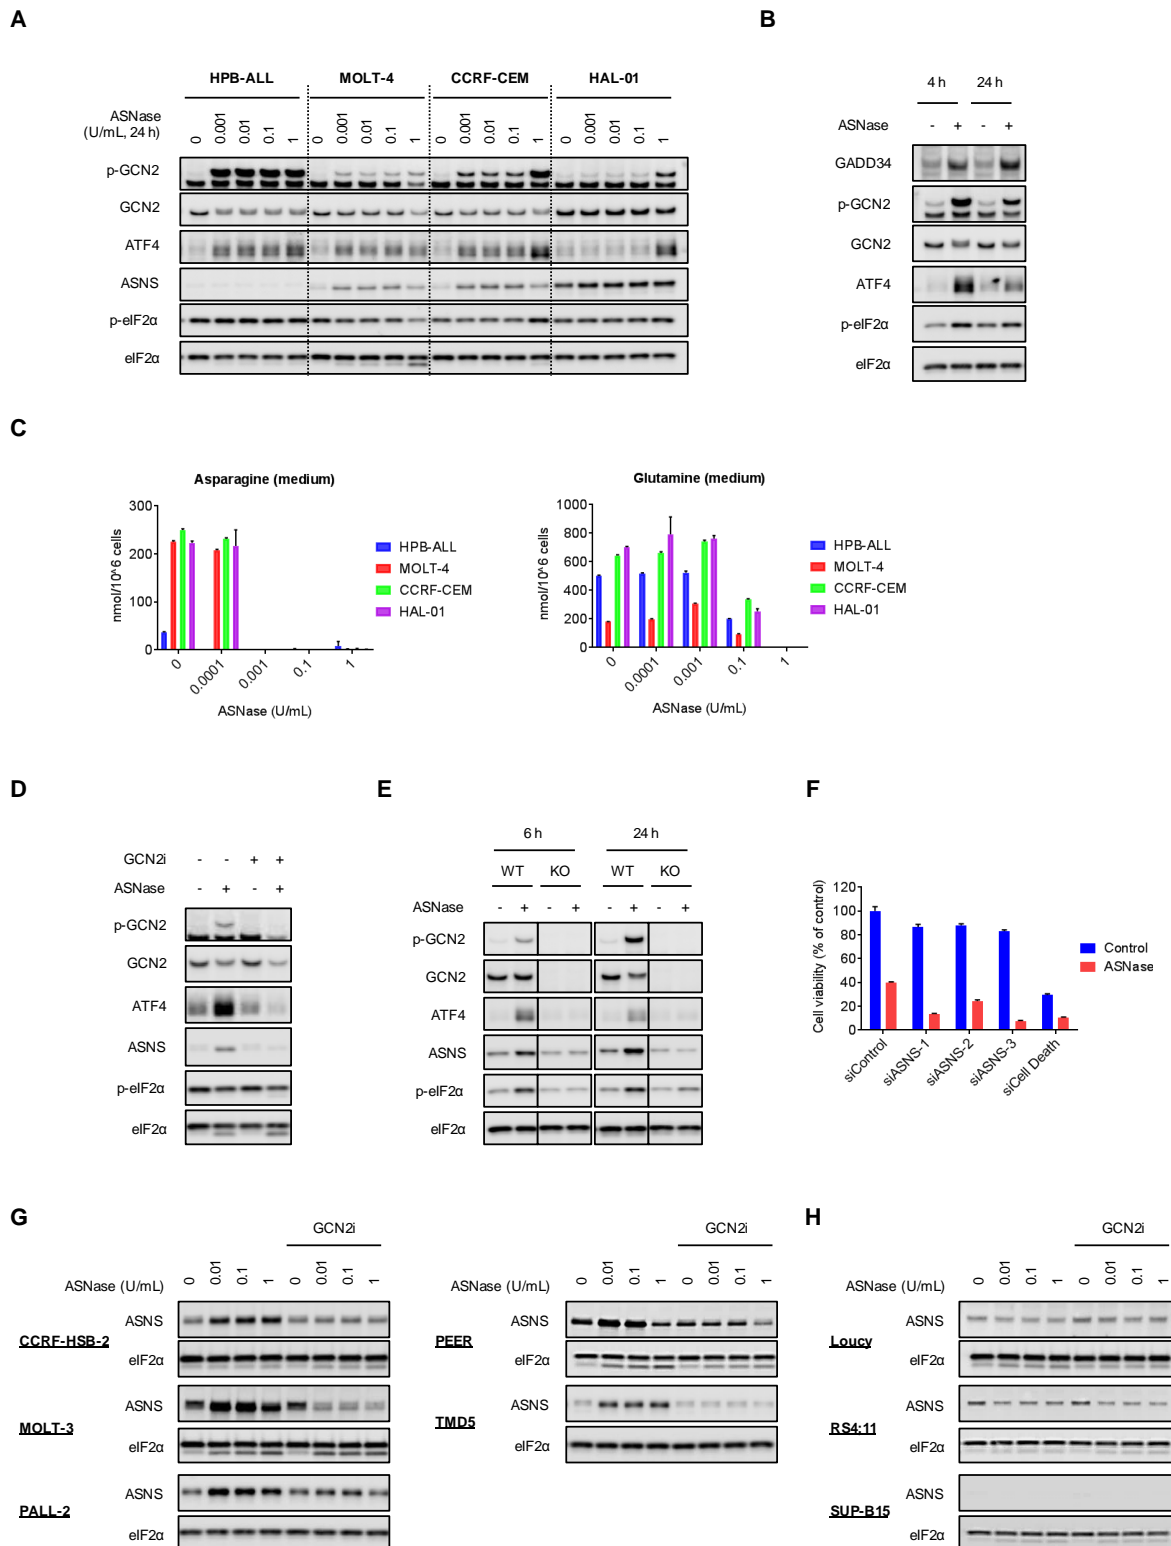

311

312

313

314

315

**Fig. S2.** Characterization of ALL and MEF cells. (A) ALL cells were treated with ASNase at the indicated concentrations for 24 h. Cell lysates were analyzed by western blot. (B) CCRF-CEM cells were treated with 1 mU/mL ASNase as indicated. Cell lysates were analyzed by western blot. (C) ALL cells were treated with

316 ASNase at the indicated concentrations for 24 h and asparagine or glutamine levels in the culture medium  
317 were measured by GC-MS (mean with SD;  $N = 3$ ). (D) MOLT-4 cells were treated with 1 mU/mL ASNase  
318 and/or 1  $\mu\text{mol/L}$  GCN2iA as indicated for 24 h. Cell lysates were analyzed by western blot. (E) MEF cells  
319 (GCN2-WT or -KO) were treated with 1 mU/mL ASNase as indicated. Cell lysates were analyzed by western  
320 blot. (F) CCRF-CEM cells were transfected with siRNA as indicated; 24 h after transfection, cells were  
321 treated with 1 mU/mL ASNase for 72 h. Cell viability was measured (mean with SD;  $N = 3$ ). (G) ALL cells  
322 that were intermediately insensitive to ASNase were treated with ASNase and/or 1  $\mu\text{mol/L}$  GCN2iA as  
323 indicated for 24 h. Cell lysates were analyzed by western blot. (H) ASNase-hypersensitive ALL cells were  
324 treated with ASNase and/or 1  $\mu\text{mol/L}$  GCN2iA as indicated for 24 h. Cell lysates were analyzed by western  
325 blot.  
326

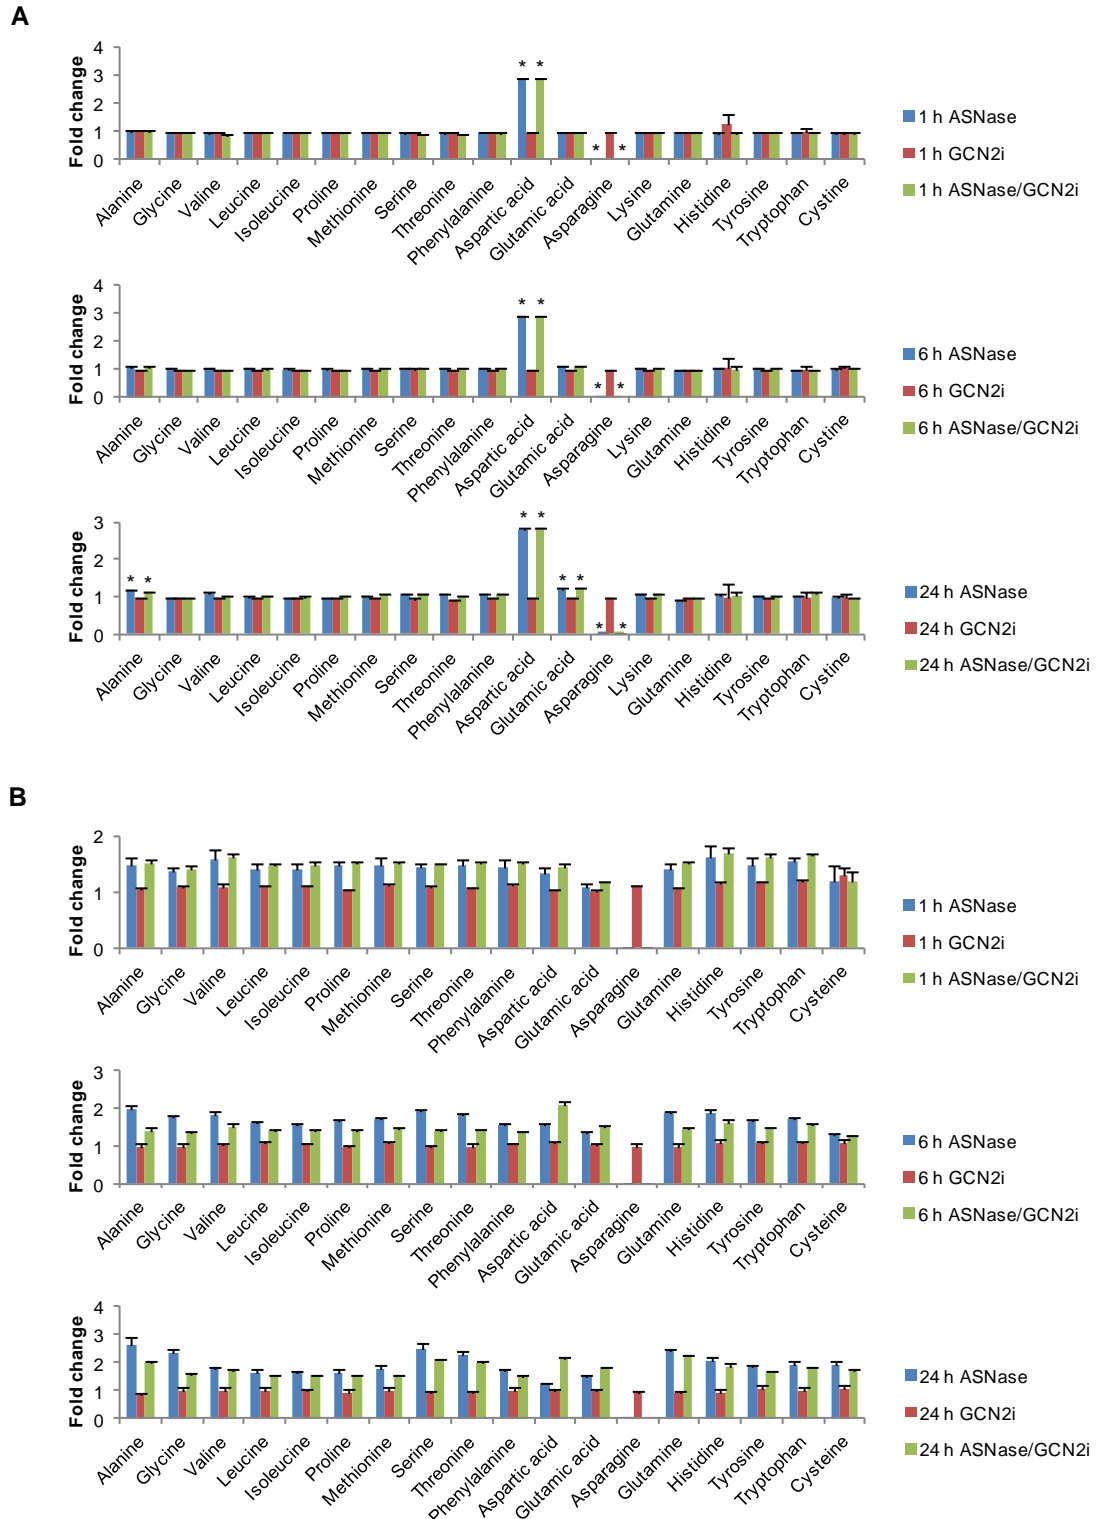

327

328

329 **Fig. S3.** Effects of GCN2 inhibition on extracellular/intracellular amino acid levels in the presence of  
 330 ASNase. CCRF-CEM cells were treated with 1  $\mu$ M ASNase and/or 1  $\mu$ M GCN2iA as indicated.

331 Amino acid levels in the culture medium (A) or in the cells (B) were measured by GC-MS (mean with SD;  $N$

332 = 3). \* $P < 0.01$ .



333

334

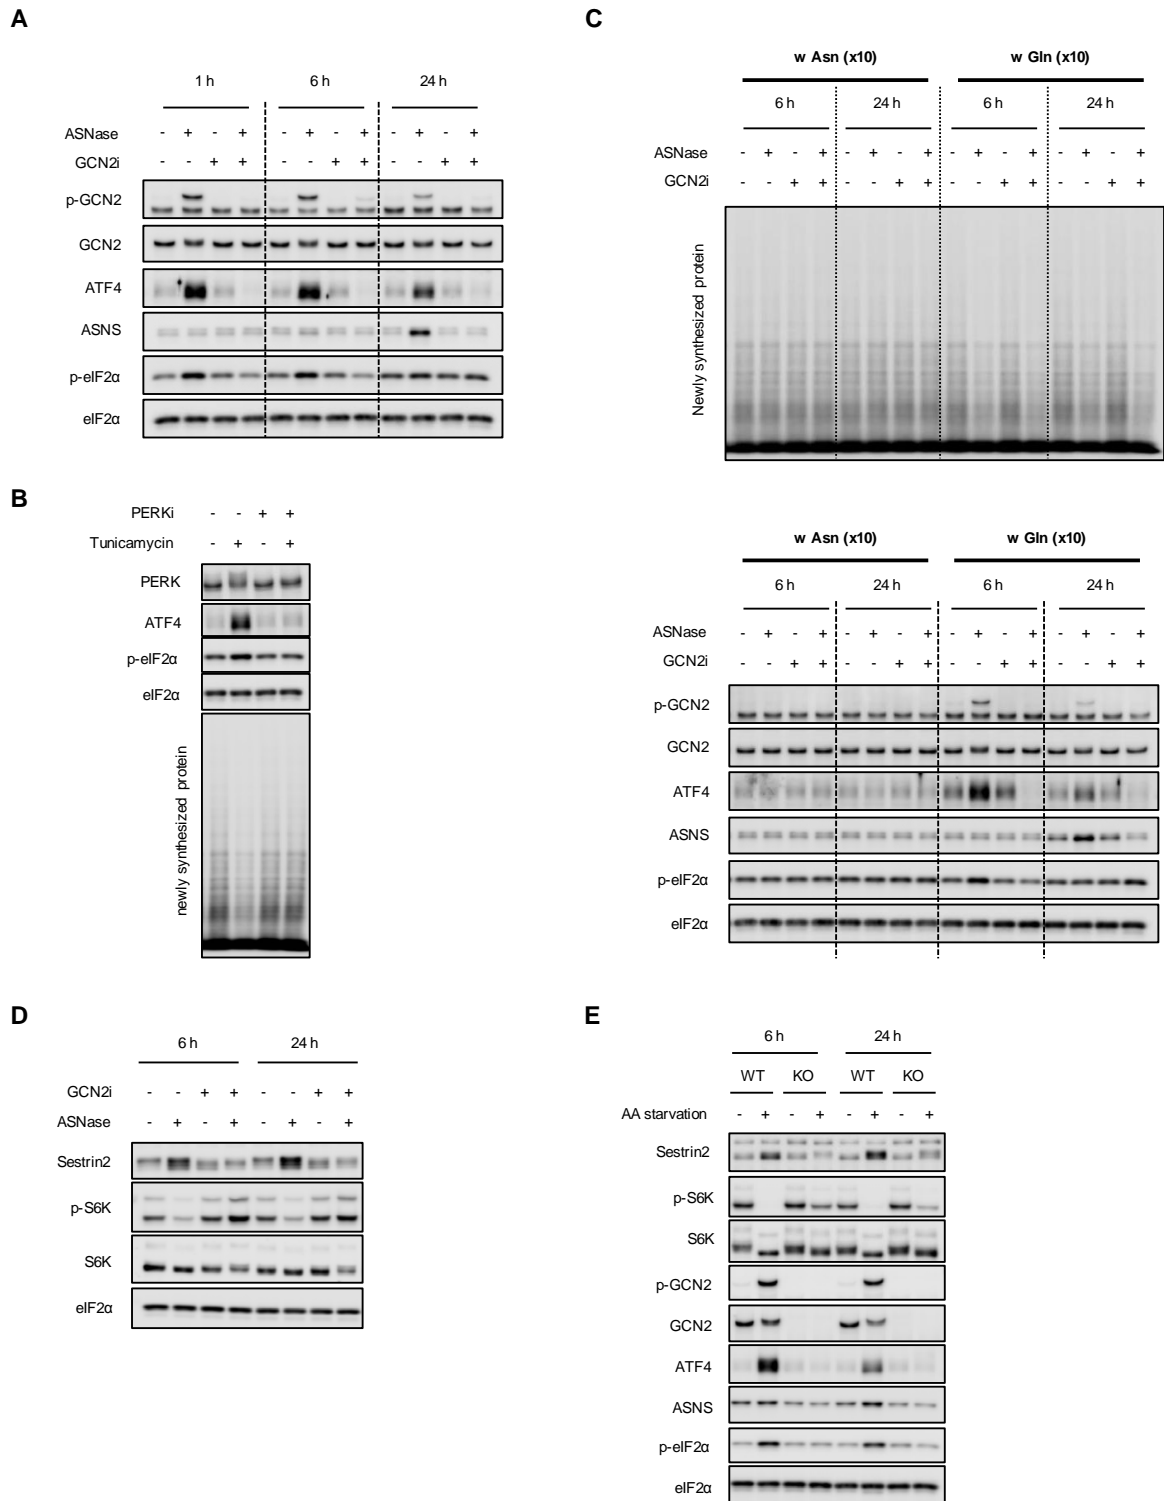

335

336

337

338 **Fig. S4.** Suppression of protein translation by GCN2 inhibition in the presence of ASNase. (A) CCRF-CEM  
 339 cells were treated with 1 mU/mL ASNase and/or 1 μmol/L GCN2iA as indicated. Cells were then treated with

340 10  $\mu\text{mol/L}$  puromycin for 10 min before harvesting. Cell lysates were analyzed by western blot. (B)  
341 CCRF-CEM cells were treated with 5  $\mu\text{g/mL}$  tunicamycin and/or 1  $\mu\text{mol/L}$  PERK inhibitor as indicated for  
342 1.5 h. Cells were then treated with 10  $\mu\text{mol/L}$  puromycin for 10 min before harvesting. Cell lysates were  
343 analyzed by western blot. (C) CCRF-CEM cells were treated with 1 mU/mL ASNase and/or 1  $\mu\text{mol/L}$   
344 GCN2iA, along with supraphysiological levels of asparagine (10  $\times$ : 4.3 mmol/L) or glutamine (10  $\times$ : 20  
345 mmol/L) as indicated. Cells were then treated with 10  $\mu\text{mol/L}$  puromycin for 10 min before being harvested.  
346 Cell lysates were analyzed by western blot using an anti-puromycin antibody to detect newly synthesized  
347 proteins. (D) CCRF-CEM cells were treated with 1 mU/mL ASNase and/or 1  $\mu\text{mol/L}$  GCN2iA as indicated.  
348 Cell lysates were analyzed by western blot. (E) MEF cells (GCN2-WT or -KO) were treated with amino  
349 acid-free medium as indicated. Cell lysates were analyzed by western blot.

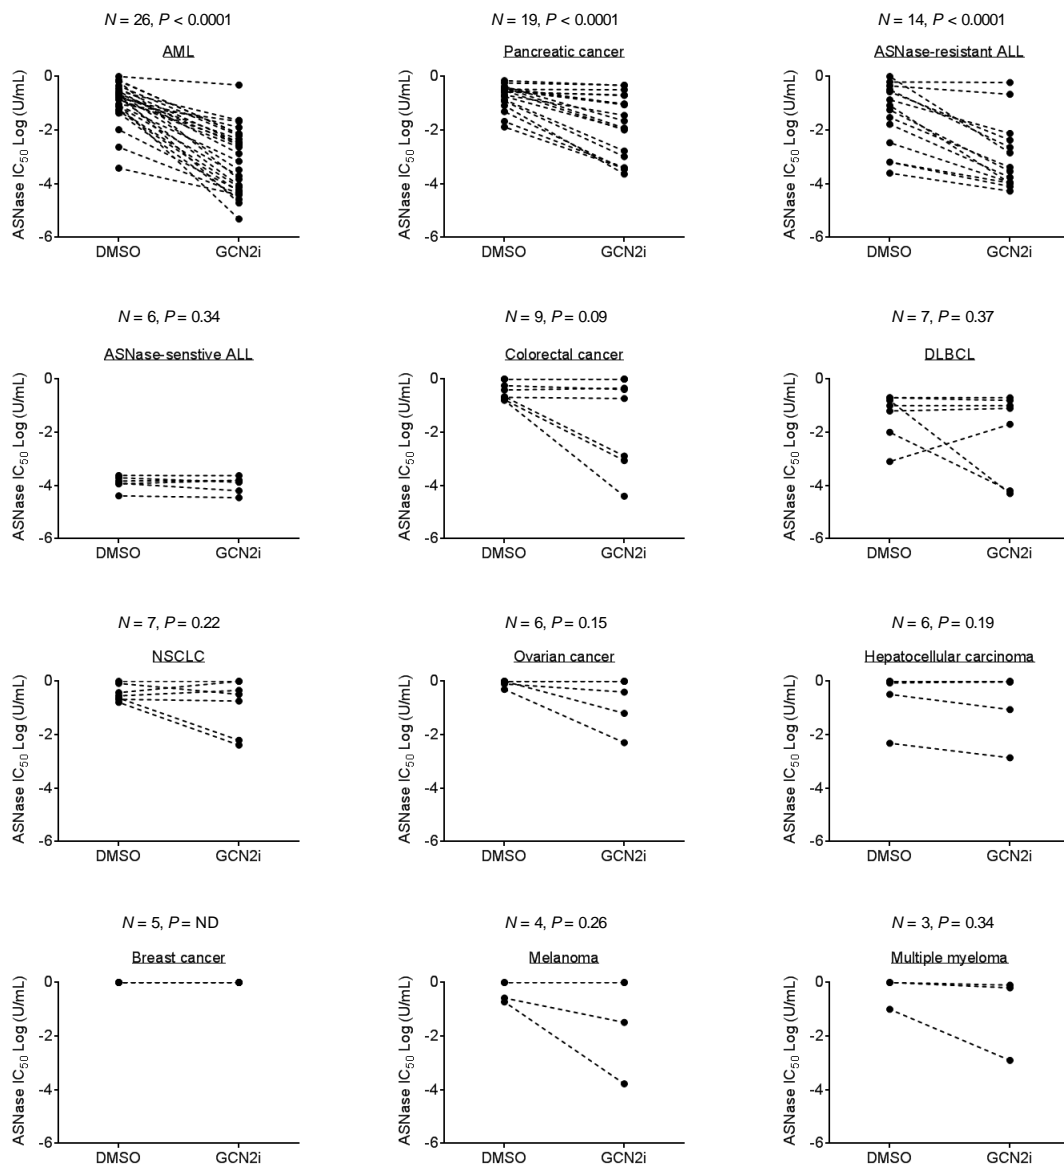

351

352

353

354 **Fig. S5.** *In vitro* antiproliferative effects of ASNase-GCN2iA combination treatment in various types of  
 355 cancer cells. Cell lines of the indicated cancer types were treated with ASNase (0.000001–1 U/mL) and/or 1  
 356  $\mu\text{mol/L}$  GCN2iA for 72 h. The cell viability was measured and the mean  $\text{IC}_{50}$  value of ASNase was calculated  
 357 ( $N = 3$ ). Plots for individual cell lines are connected by dotted lines. To assess the combined effects, a paired  
 358 *t*-test was performed. DLBCL, diffuse large cell B-cell lymphoma; NSCLC, non-small cell lung cancer.

359  
360  
361  
362  
363  
364  
365  
366  
367  
368

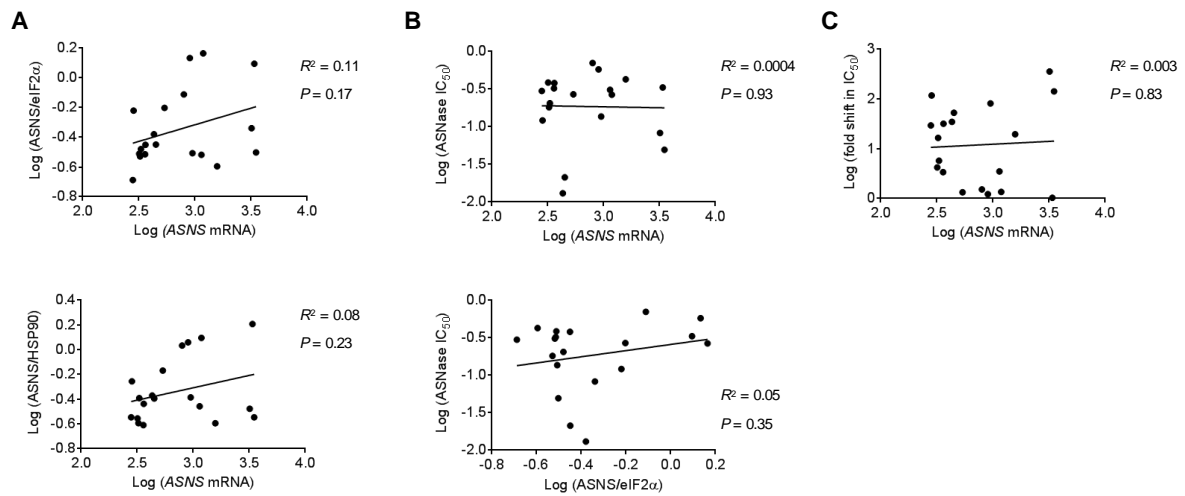

369  
370  
371  
372  
373  
374  
375  
376  
377  
378  
379

**Fig. S6.** Correlation between ASNS expression and the combined effects of ASNase treatment with GCN2 inhibition in pancreatic cancer cells. (A) Correlation between mRNA and protein levels of ASNS (normalized against eIF2 $\alpha$  or HSP90 levels) was analyzed. (B) Correlation between IC<sub>50</sub> value of ASNase and mRNA or protein levels of ASNS (normalized against eIF2 $\alpha$  levels) was analyzed. (C) Correlation between the combined effects of ASNase treatment with GCN2iA inhibition (fold-change in IC<sub>50</sub> value) and ASNS mRNA levels (normalized against eIF2 $\alpha$  level) was analyzed. Linear regression analysis was performed, and *R*- and *P*-values determined by Pearson's correlation are indicated. PL-45 cells were excluded from the analysis owing to their slow growth during the 72-h culture for the cell viability assay.

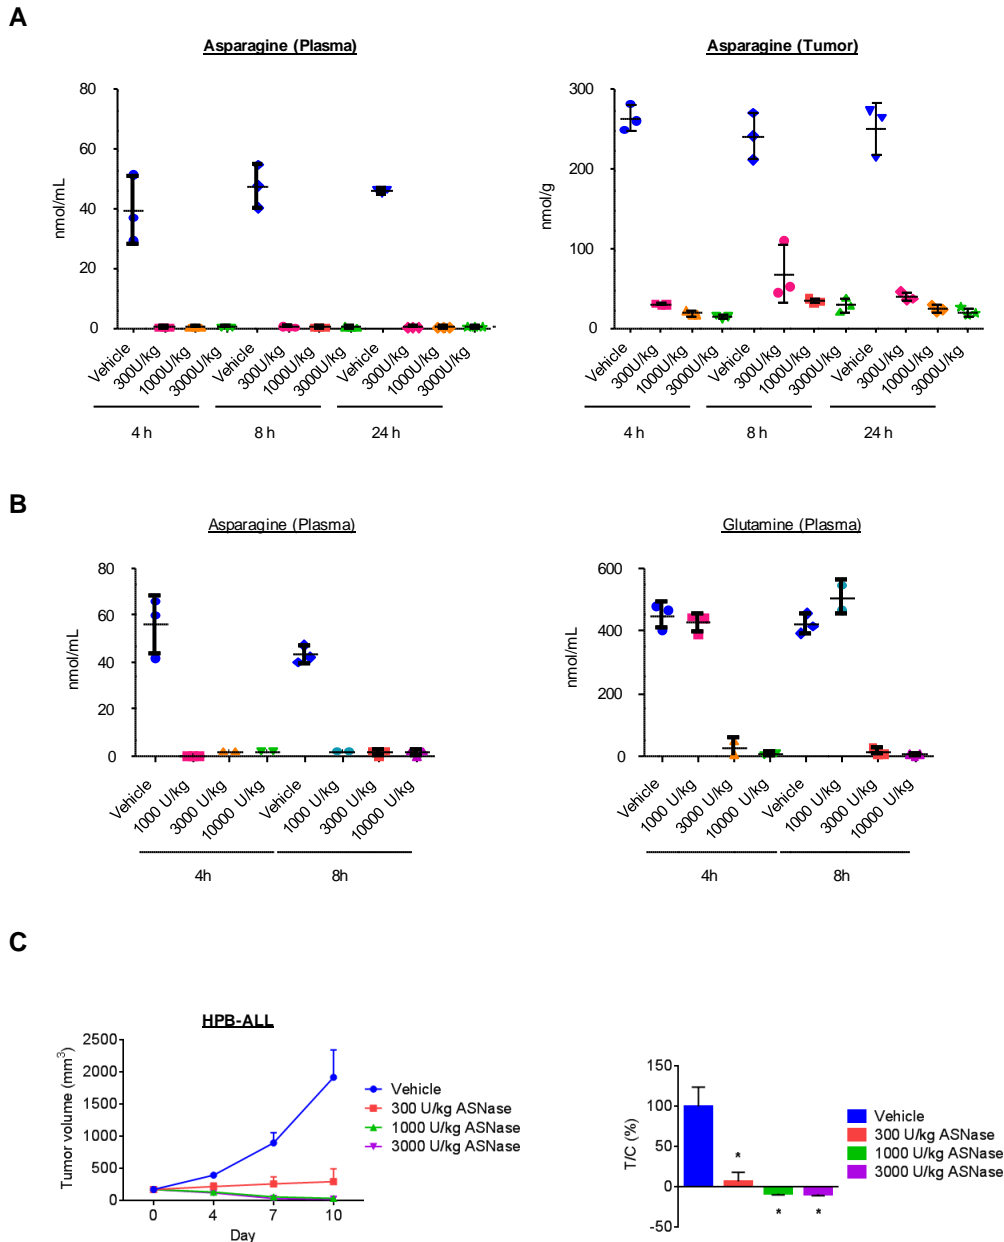

380

381

382

383 **Fig. S7.** *In vivo* depletion of asparagine or glutamine in mice by ASNase administration. (A) Mice with

384 CCRF-CEM xenografts were treated with ASNase at the indicated doses for 4, 8, or 24 h. Asparagine levels

385 in plasma or tumors were measured by GC-MS. Plots represent values from three biological replicates with

386 SD. (B) Mice were treated once daily with ASNase at the indicated doses for 7 days. The asparagine and

387 glutamine levels in plasma were measured with GC-MS 4 or 8 h after the final dose. Plots represent values of

388 two or three biological replicates with SD. (C) Mice bearing HPB-ALL xenografts were treated once daily

389 with ASNase at the indicated doses for 10 days. Left, Tumor growth curves; Right, T/C values on day 10.

390 Day 1 indicates the beginning of treatment. Data show mean tumor volume or T/C values with SD ( $N = 5$ ).

391 Dunnett's multiple-comparison test was performed;  $*P < 0.0001$  (compared with vehicle-treated control).

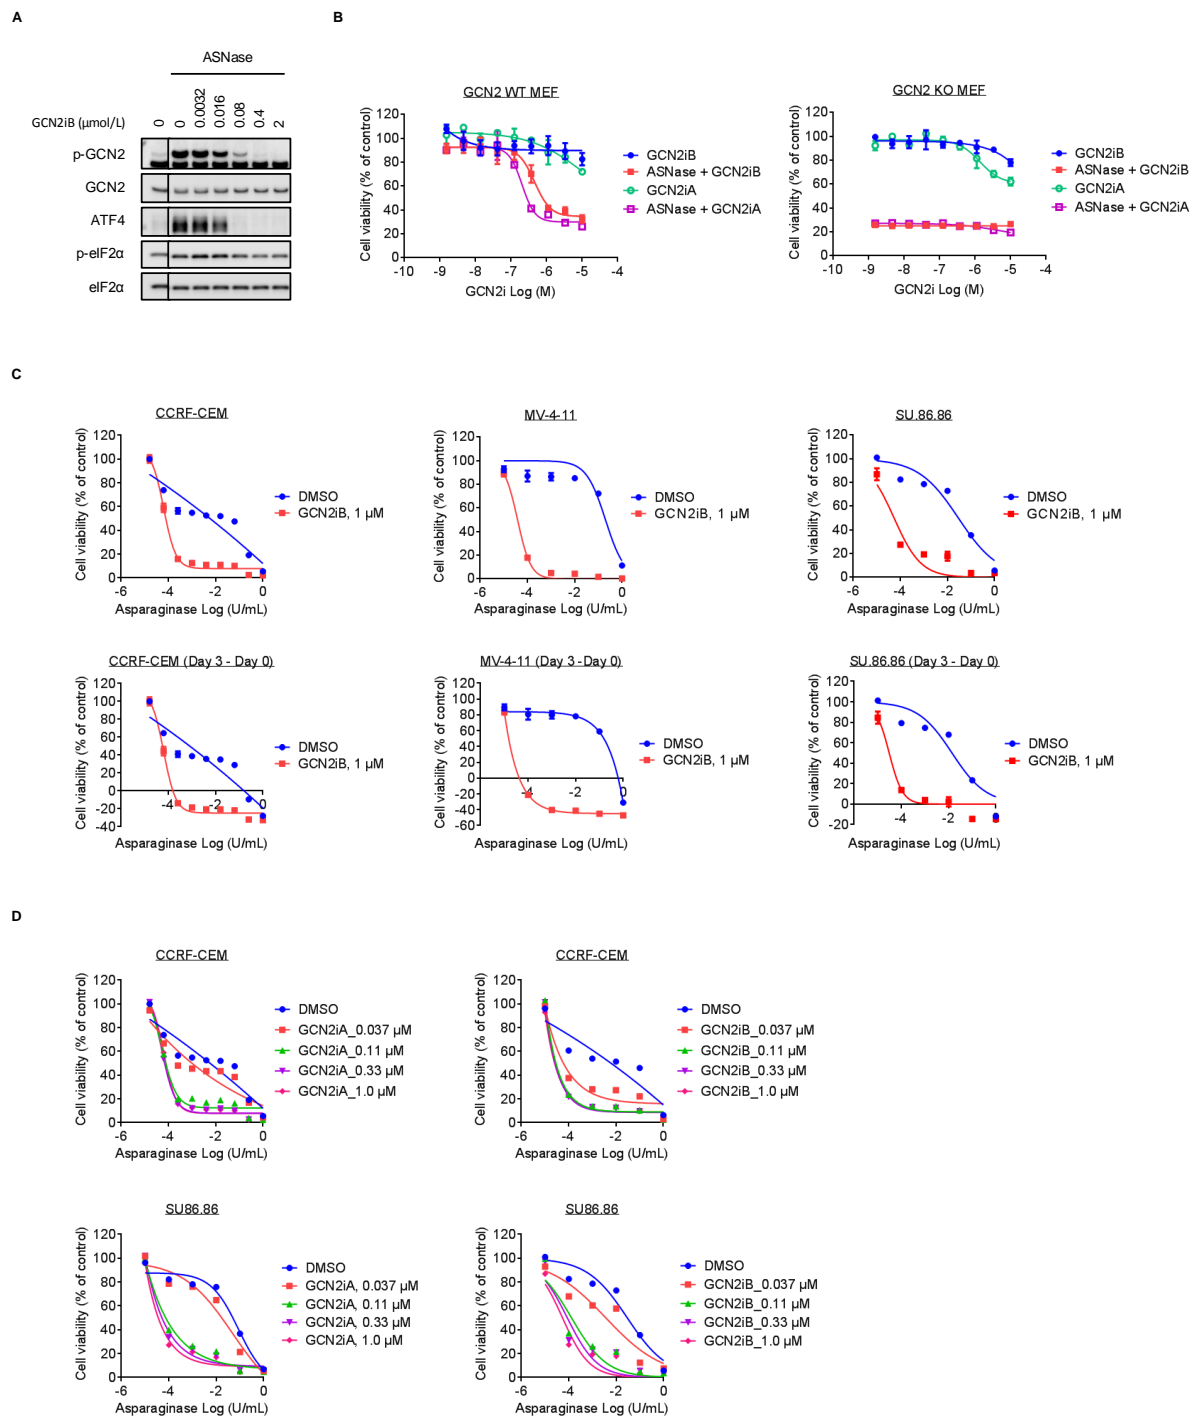

392  
393  
394  
395  
396  
397  
398  
399

**Fig. S8.** *In vitro* characterization of GCN2iB. (A) CCRF-CEM cells were treated with 1 mU/mL ASNase and/or GCN2iB as indicated for 4 h. Cell lysates were analyzed by western blot. (B) MEF cells (GCN2-WT or -KO) were treated with 1 mU/mL ASNase and/or GCN2 inhibitors as indicated for 72 h. Cell viability was measured (mean with SD;  $N = 3$ ). (C) CCRF-CEM, MV-4-11, and SU.86.86 cells were treated with ASNase and/or 1 μmol/L GCN2iB as indicated for 72 h. Cell viability was measured at day 0 and day 3 (mean with SD;  $N = 3$ ). (D) CCRF-CEM and SU.86.86 cells were treated with ASNase and/or GCN2 inhibitors as indicated for 72 h. Cell viability was measured (mean with SD;  $N = 3$ ).

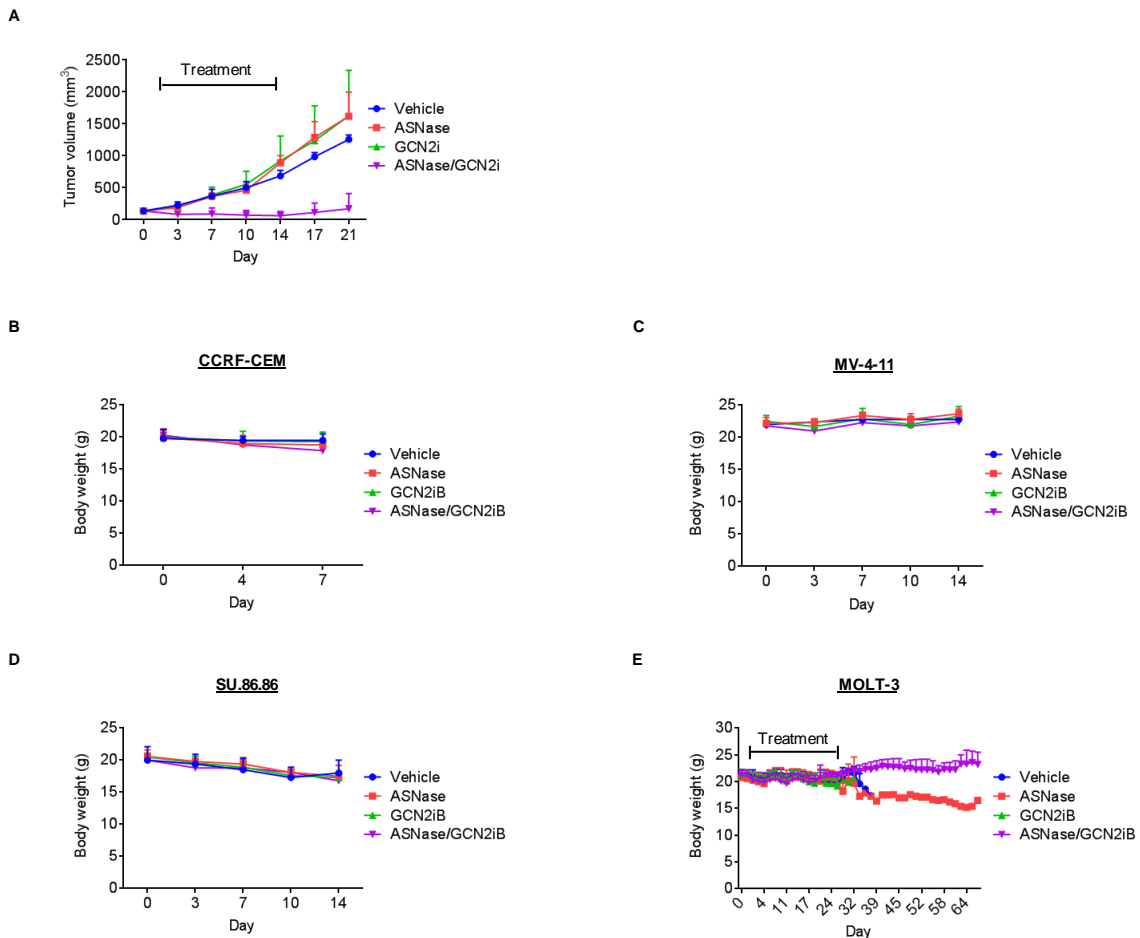

401

402

403 **Fig. S9.** Changes in the body weight of mice. (A) Mice bearing MV-4-11 xenografts were treated first 3  
 404 days a week with GCN2iB (10 mpk, twice a day) and/or ASNase (1,000 U/kg, once a day) as indicated for 14  
 405 days. Data represent mean tumor volume with SD ( $N = 5$ ). Tumor volume was measured until 1 week after  
 406 drug cessation. (B) Mice bearing CCRF-CEM xenografts were treated daily with GCN2iB (10 mpk, twice a  
 407 day) and/or ASNase (1,000 U/kg, once a day) as indicated for 7 days. (C) Mice bearing MV-4-11 xenografts  
 408 were treated first 3 days a week with GCN2iB (10 mpk, twice a day) and/or ASNase (1,000 U/kg, once a day)  
 409 as indicated for 14 days. (D) Mice bearing SU.86.86 xenografts were treated first 3 days a week with  
 410 GCN2iB (10 mpk, twice a day) and/or ASNase (1,000 U/kg, once a day) as indicated for 14 days. Data  
 411 represent mean body weight with SD ( $N = 5$ ). (E) MOLT-3 cells were inoculated into SCID mice via the tail  
 412 vein at 14 days before randomization. From the next day of randomization, mice were treated first 3 days a  
 413 week with GCN2iB (10 mpk, twice a day) and/or ASNase (1,000 U/kg, once a day) as indicated for 28 days.  
 414 Data represent mean body weight with SD ( $N = 7$ ).

415

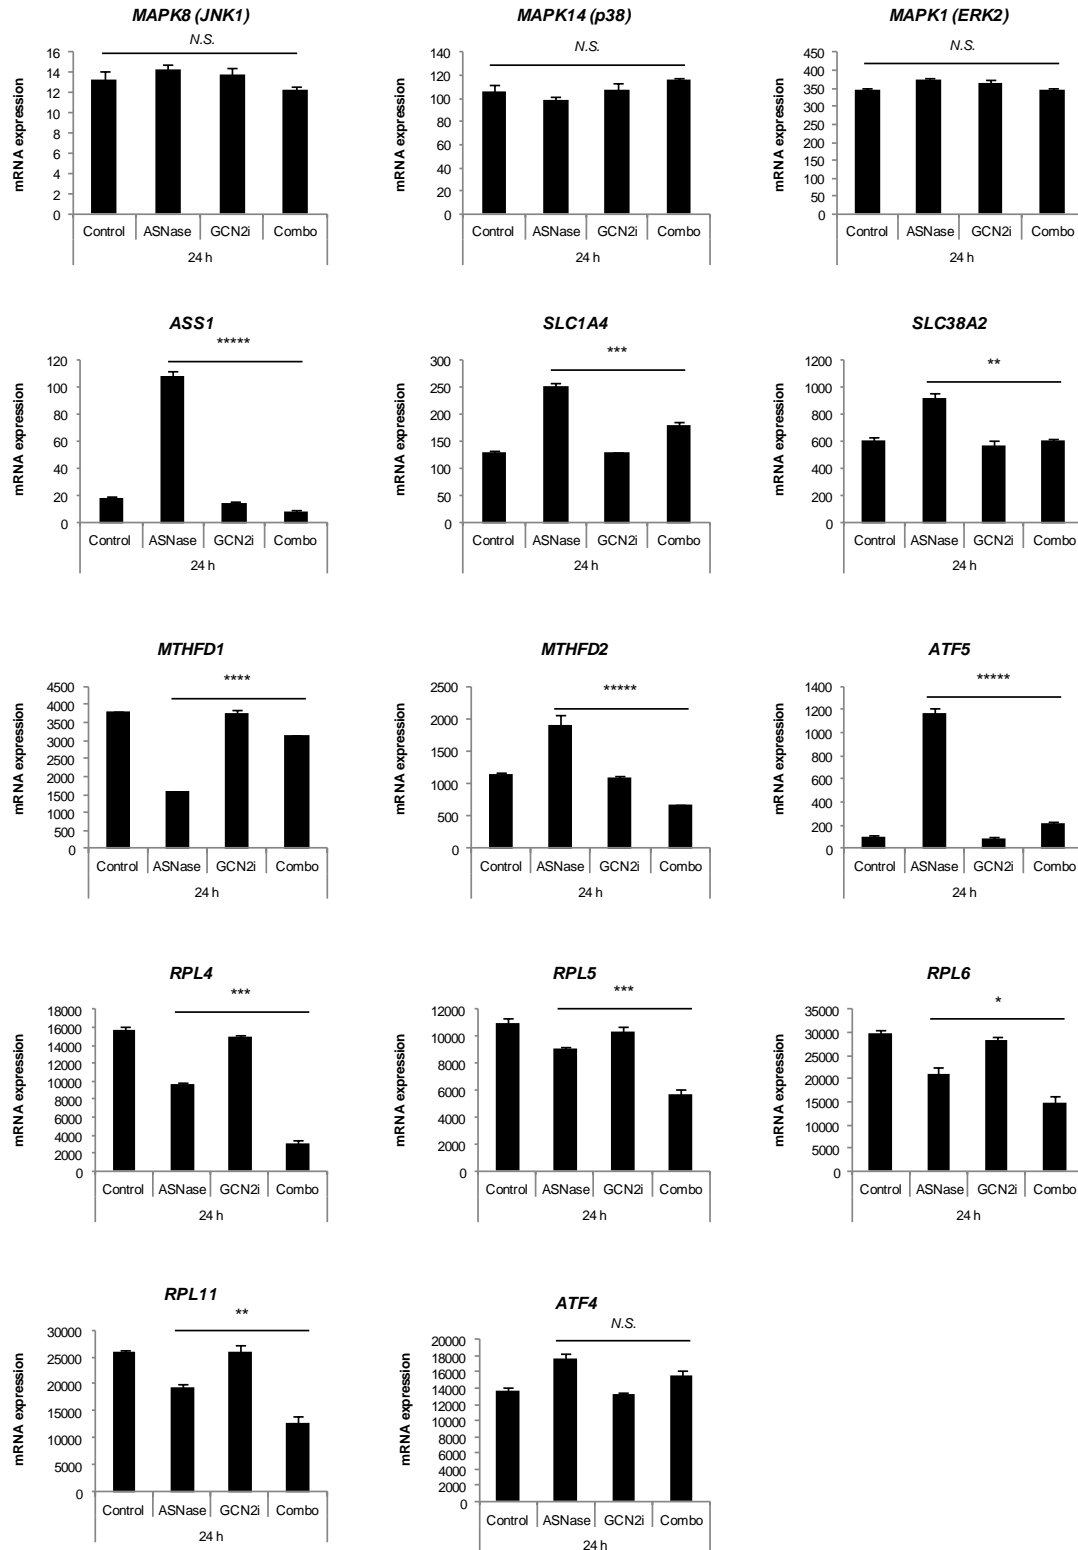

416  
 417 **Fig. S10.** Gene expression analysis of previously identified factors that determine ASNase sensitivity.  
 418 CCRF-CEM cells were treated with 1 μM ASNase and/or 1 μM GCN2iA for 24 h, and gene  
 419 expression levels were determined by microarray analysis (mean with SD;  $N = 3$ ). \* $P < 0.01$ ; \*\* $P < 0.001$ ;  
 420 \*\*\* $P < 0.0001$ ; \*\*\*\* $P < 0.00001$ ; \*\*\*\*\* $P < 0.000001$ ; and \*\*\*\*\* $P < 0.0000001$ . N.S., not significant ( $P >$   
 421 0.05).



422 **Supplementary Tables**423 **Table 1.** *In vitro* effects of combined treatment with ASNase and GCN2iA inhibition on the proliferation of

424 ALL cells.

| ALL cell line | Log (ASNase IC <sub>50</sub> ) |        |             | Log (ASNase IC <sub>70</sub> ) |        |             | Log (ASNS mRNA) | Log (ASNS/eIF2α) | ASNase sensitivity         |
|---------------|--------------------------------|--------|-------------|--------------------------------|--------|-------------|-----------------|------------------|----------------------------|
|               | DMSO                           | GCN2iA | Fold change | DMSO                           | GCN2iA | Fold change |                 |                  |                            |
| BALL-1        | -0.35                          | -0.66  | 0.31        | -0.23                          | -0.57  | 0.34        | Not available   | -0.29            | Hyperinsensitive           |
| CCRF-CEM      | -1.78                          | -3.76  | 1.98        | -1.06                          | -3.81  | 2.75        | 1.98            | -0.92            | Intermediately insensitive |
| CCRF-HSB-2    | -3.19                          | -4.10  | 0.91        | -2.26                          | -3.95  | 1.69        | Not available   | -0.77            | Intermediately insensitive |
| DND-41        | -3.71                          | -3.88  | 0.17        | -3.68                          | -3.66  | -0.02       | 1.66            | -1.10            | Hypersensitive             |
| HAL-01        | -0.87                          | -2.12  | 1.26        | -0.30                          | -0.81  | 0.51        | Not available   | -0.10            | Hyperinsensitive           |
| HPB-ALL       | -3.83                          | -3.81  | -0.01       | -3.72                          | -3.72  | 0.00        | 2.09            | -1.28            | Hypersensitive             |
| Jurkat        | -1.24                          | -3.54  | 2.30        | -0.70                          | -2.76  | 2.06        | 3.06            | -0.45            | Intermediately insensitive |
| Loucy         | -3.94                          | -3.80  | -0.13       | -3.76                          | -3.58  | -0.18       | 1.43            | -1.27            | Hypersensitive             |
| MOLT-3        | -2.47                          | -3.95  | 1.48        | -1.22                          | -3.84  | 2.62        | Not available   | -1.20            | Intermediately insensitive |
| MOLT-4        | -3.19                          | -3.97  | 0.78        | -2.47                          | -3.79  | 1.33        | 2.10            | -0.96            | Intermediately insensitive |
| NALM-6        | -0.57                          | -2.37  | 1.81        | -0.10                          | -1.28  | 1.17        | 2.68            | -0.27            | Hyperinsensitive           |
| PALL-2        | -1.53                          | -3.39  | 1.86        | -0.20                          | -2.49  | 2.29        | Not available   | -0.65            | Intermediately insensitive |
| PEER          | -3.60                          | -4.27  | 0.67        | -2.72                          | -4.12  | 1.40        | 2.41            | -0.99            | Intermediately insensitive |
| Reh           | -1.08                          | -3.98  | 2.90        | -0.03                          | -2.68  | 2.65        | 2.63            | -0.68            | Intermediately insensitive |
| RS4;11        | -3.91                          | -4.20  | 0.28        | -3.76                          | -4.04  | 0.28        | 1.74            | -1.49            | Hypersensitive             |
| SUP-B15       | -4.39                          | -4.46  | 0.07        | -4.29                          | -4.40  | 0.11        | 1.91            | -1.40            | Hypersensitive             |
| SUP-T1        | -0.49                          | -2.64  | 2.15        | -0.02                          | -1.42  | 1.41        | 2.53            | -0.46            | Hyperinsensitive           |
| TALL-1        | -3.62                          | -3.63  | 0.00        | -3.60                          | -3.60  | 0.00        | 2.12            | -1.50            | Hypersensitive             |
| Tanoue        | -0.20                          | -0.22  | 0.02        | 0.00                           | 0.00   | 0.00        | 3.45            | -0.09            | Hyperinsensitive           |
| TMD5          | 0.00                           | -2.85  | 2.85        | 0.00                           | -1.71  | 1.71        | Not available   | -1.28            | Intermediately insensitive |

425 NOTE: ALL cell lines were treated with ASNase (0.00001–1 U/mL) and/or GCN2iA (1 μmol/L). The IC<sub>50</sub>426 or IC<sub>70</sub> value of ASNase, fold change in IC<sub>50</sub> or IC<sub>70</sub> value after GCN2iA treatment, ASNS mRNA427 expression, and ASNS protein expression are shown at log<sub>10</sub> scale. For ASNase sensitivity, cells are

428 categorized as follows.

429 Hypersensitive; both IC<sub>50</sub> and IC<sub>70</sub> < -3 on the log<sub>10</sub> scale

430 Intermediately insensitive;  $-3 < IC_{50}$  or  $IC_{70} < -1$  on the  $\log_{10}$  scale

431 Hyperinsensitive; both  $IC_{50}$  and  $IC_{70} > -1$  on the  $\log_{10}$  scale

432

433 **Table 2.** *In vitro* effects of combined treatment with ASNase and GCN2 inhibition on the proliferation of  
 434 pancreatic cancer cells.

| Pancreatic cancer cell line | Log (ASNase IC <sub>50</sub> ) |        |             | Log (ASNS mRNA) | Log (ASNS/eIF2α) |
|-----------------------------|--------------------------------|--------|-------------|-----------------|------------------|
|                             | DMSO                           | GCN2iA | Fold change |                 |                  |
| AsPC-1                      | -1.08                          | -3.64  | -2.55       | 3.51            | -0.34            |
| BxPC-3                      | -0.49                          | -1.02  | -0.53       | 2.56            | -0.51            |
| Capan-1                     | -0.57                          | -0.70  | -0.13       | 3.07            | 0.17             |
| Capan-2                     | -0.42                          | -1.92  | -1.50       | 2.56            | -0.45            |
| CFPAC-1                     | -0.24                          | -0.32  | -0.09       | 2.96            | 0.13             |
| DAN-G                       | -0.57                          | -0.69  | -0.12       | 2.73            | -0.20            |
| HPAC                        | -0.74                          | -1.96  | -1.22       | 2.51            | -0.53            |
| HPAF-II                     | -0.15                          | -0.33  | -0.18       | 2.90            | -0.11            |
| HuP-T3                      | -0.52                          | -1.99  | -1.47       | 2.45            | -0.69            |
| HuP-T4                      | -0.86                          | -2.78  | -1.91       | 2.98            | -0.51            |
| KP4                         | -0.48                          | -0.49  | -0.01       | 3.53            | 0.10             |
| Panc 02.03                  | -0.69                          | -1.45  | -0.76       | 2.52            | -0.48            |
| Panc 04.03                  | -0.51                          | -1.05  | -0.54       | 3.06            | -0.52            |
| Panc 05.04                  | -1.88                          | -3.43  | -1.54       | 2.64            | -0.38            |
| PK-45H                      | -0.41                          | -1.04  | -0.62       | 2.50            | -0.51            |
| PK-59                       | -0.37                          | -1.66  | -1.29       | 3.20            | -0.60            |
| SU.86.86                    | -1.31                          | -3.46  | -2.15       | 3.55            | -0.50            |
| SUIT2                       | -0.92                          | -2.99  | -2.07       | 2.45            | -0.22            |
| TCC-PAN2                    | -1.67                          | -3.40  | -1.72       | 2.65            | -0.45            |

435 NOTE: Pancreatic cancer cell lines were treated with ASNase (0.00001–1 U/mL) and/or 1 μmol/L  
 436 GCN2iA. The IC<sub>50</sub> value of ASNase, fold change in IC<sub>50</sub> value after GCN2iA treatment, and mRNA and  
 437 protein levels of ASNA are shown at log<sub>10</sub> scale.

438

439 **Supplementary References**

440

441 1. Li Y, Cheng H, Zhang Z, Zhuang X, Luo J, Long H, Zhou Y, Xu Y, Taghipouran R, Li D, Patterson A,  
442 Smaill J, Tu Z, Wu D, Ren X, Ding K (2015) N-(3-Ethynyl-2,4-difluorophenyl)sulfonamide Derivatives as  
443 Selective Raf Inhibitors. *ACS Med Chem Lett* 6:543-547.

444 2. Nakamura A, et al. (2013) Antitumor activity of the selective pan-RAF inhibitor TAK-632  
445 in BRAF inhibitor-resistant melanoma. *Cancer Res* 73(23):7043-7055.
